# Supplementary material
Source: publisher figshare collection journal article supplement (https://frontiersin.figshare.com/ndownloader/files/23896655)
Supplement: Supplementary file 1 [file 23896655]

Appendix

List of variables included by category and level of analysis

| **LEVEL** | **CATEGORIES OF FACTORS** | | | **VARIABLES** | | |
| --- | --- | --- | --- | --- | --- | --- |
|  | **Child Physical Factors & Health** | | | Child's weight compared to others of this age | | |
|  |  | | | Child's height compared to others of this age | | |
|  |  | | | calculated bmi=weight / squared(height)- Round 3 | | |
|  |  | | | weight-for-age z-score- Round 3 | | |
|  |  | | | height-for-age z-score- Round 3 | | |
|  |  | | | bmi-for-age z-score- Round 3 | | |
|  |  | | | calculated bmi=weight / squared(height)- Round 2 | | |
|  |  | | | weight-for-age z-score- Round 2 | | |
|  |  | | | height-for-age z-score- Round 2 | | |
|  |  | | | bmi-for-age z-score- Round 2 | | |
|  |  | | | Birth weight (grams) | | |
| **STUDENT** |  | | | calculated bmi=weight / squared(clenhei) | | |
|  |  | | | weight-for-age z-score- Round 1 | | |
|  |  | | | length/height-for-age z-score- Round 1 | | |
|  |  | | | bmi-for-age z-score- Round 1 | | |
|  |  | | | flag = 1 if (zhfa < -6 | zhfa >6) | | |
|  |  | | | flag = 1 if (zbfa < -5 | zbfa >5) | | |
|  |  | | | BRTHCARE: Level of care at birth according to dr, nurse, midwife, presence | | |
|  |  | | | Was child breastfed? | | |
|  |  | | | Child's health compared to others of this age | | |
|  |  | | | Does child have any long term health problems? | | |
|  |  | | | Number of times child ate in the last 24 hour? | | |
|  | **Child preschool and school trajectory** | | | Did YL child attend creche before 3yrs of age | | |
|  |  | | | How long child attended preschool | | |
|  |  | | | How is child faring at pre-school | | |
| **STUDENT** |  | | | Age of child first attended preschool | | |
|  |  | | | Days per week attending preschool | | |
|  |  | | | At what age did this child start formal school? | | |
|  |  | | | Does NAME have any difficulties in getting to school? acc to HH | | |
| **LEVEL** | **CATEGORIES OF FACTORS** | | | **VARIABLES** | | |
|  |  | | | During the last 12 months has NAME ever missed school for a week or more? acc to HH | | |
|  |  | | | What was the highest grade that this child has completed? | | |
|  |  | | | Did you have to pay for child to attend? | | |
|  |  | | | How many days has the pupil been absent this academic year? | | |
|  |  | | | Number of days absent in current school year | | |
|  |  | | | Frequency of pupil drop out in last academic year | | |
|  |  | | | Type of school child is attending or likely to attend | | |
|  |  | | | Has NAME participated in extra classes in the last 6 months? | | |
|  |  | | | Is this child currently in full-time education? | | |
|  |  | | | Is the Pupil Present or Absent: | | |
|  | **Child routines and habits** | | | How many hours does NAME spend asleep in a typical night? | | |
|  |  | | | Number of hours NAME spends in a typical day on - school | | |
|  |  | | | Number of hours NAME spends in a typical day on - leisure/playing/seeing friends/etc. | | |
|  |  | | | Number of hours NAME spends in a typical day on - studying at home | | |
|  |  | | | Hours that child spent caring for others on a typical day according to HH | | |
| **STUDENT** |  | | | Hours that child spent on domestic tasks on a typical day according to HH | | |
|  |  | | | Hours that child spent on family farm or business on a typical day acc. to HH | | |
|  |  | | | Hours that child spent on paid activities on a typical day acc. to HH | | |
|  |  | | | Hours that child spent on general leisure on a typical day acc. to HH | | |
|  |  | | | Hours that child spent at school on a typical day acc. to HH | | |
|  |  | | | Hours that child spent sleeping on a typical day acc to HH | | |
|  |  | | | Hours that child spent studying outside school on a typical day acc to HH | | |
|  | **Cognitive factors** | | | Academic ability | | |
|  |  | | | Reading Item | | |
|  |  | | | Writing Item | | |
|  |  | | | The child can read at least one example | | |
|  |  | | | Commom Item Reading | | |
| **STUDENT** |  | | | Commom Item Writing | | |
|  |  | | | Commom Item Numeracy | | |
|  |  | | | Reading & Writting Duration-minutes | | |
| **LEVEL** | **CATEGORIES OF FACTORS** | | | **VARIABLES** | | |
|  |  | | | Total words read at 60 seconds | | |
|  |  | | | Total correct words in 60 seconds | | |
|  |  | | | Total words read at 60 seconds - Section B | | |
|  |  | | | Words per minute | | |
|  |  | | | Words per minute (paragraph) | | |
|  |  | | | EGRA (reading + oral) rasch score - corrected | | |
|  |  | | | Math rasch score - corrected | | |
| **STUDENT** |  | | | EGRA Global score - Factor | | |
|  |  | | | EGRA corrected Global score - Factor | | |
|  |  | | | EGRA rasch Global score - Factor | | |
|  |  | | | Highest item responded to | | |
|  |  | | | Raw score in the CDA test | | |
|  |  | | | Rasch score in the CDA test | | |
|  |  | | | Rasch score in the PPVT test | | |
|  |  | | | Were conditions for PPVT adequate | | |
|  |  | | | Were conditions for CDA-Q adequate | | |
|  | **Non-cognitive factors & Self-regulation** | | | How do you feel about life, things, health, getting on with people, being safe, future? | | |
|  |  | | | Child positive Attitute and Perceptions about trust people, friends standby, being proud of cloth, if study hard | | |
|  |  | | | Child negative Attitute and Perceptions about others decide instead of child, having no choice about work | | |
|  |  | | | Motivation to succeed at school | | |
| **STUDENT** |  | | | Participation in class | | |
|  |  | | | How do you think you are doing compared to other children in your class? | | |
|  |  | | | Where on the ladder do you feel you (child) personally stand at the moment? | | |
|  |  | | | Social Network level, if others look at child as leader, include in games, help other | | |
|  |  | | | Has NAME ever been bullied by peers? | | |
|  | **Community** | | | Are continuing education classes available for adults in your community? | | |
|  |  | | | Level of health facility in the community | | |
| **COMMUNITY** |  | | | Level of Health personnel in the community | | |
|  |  | | | Urban or Rural site | | |
|  |  | | | Region | | |
| **LEVEL** | | **CATEGORIES OF FACTORS** | | | **VARIABLES** | |
|  |  | | | Urban or Rural | | |
|  | **HH Background & Education** | | | Any events that decreased household welfare since pregnancy with child | | |
|  |  | | | Number of events | | |
| **PARENTS** |  | | | Can the father read & understand letter or newspaper in Telugu? | | |
|  |  | | | Can the mother read & understand letter or newspaper in Telugu? | | |
|  |  | | | Can the caregiver read & understand letter or newspaper in Telugu? | | |
|  |  | | | Father's education level | | |
|  |  | | | Mother's education level | | |
|  |  | | | Caregiver's education level | | |
|  |  | | | Can caregiver read and understand letter or newspaper in any language | | |
|  |  | | | Can caregiver read and understand letter or newspaper in key language | | |
|  |  | | | Caregiver's fluency in key language | | |
|  |  | | | Caregiver's ethnic group or caste | | |
|  |  | | | Education of caregiver | | |
|  |  | | | Education of household head | | |
|  |  | | | Education of caregiver's partner | | |
|  |  | | | Highest grade caregiver completed in school | | |
|  |  | | | Level of support at home | | |
|  | **Parenting & Caregiver** | | | How people in this area treat you? | | |
|  |  | | | Do you know the names of NAME's friends? | | |
|  |  | | | Do you know what NAME does after school/work? | | |
|  |  | | | Do you know the parents of NAME's friends? | | |
|  |  | | | Do you know NAME's teacher? | | |
|  |  | | | Is Mum or Dad primary caregiver? | | |
|  |  | | | How often does the father see the YL child? | | |
|  |  | | | How often does the mother see the YL child? | | |
| **PARENTS** |  | | | How often does the caregiver see the YL child? | | |
|  |  | | | Main people caring for YL child before 3yrs of age | | |
|  |  | | | Main people caring for YL child before 3yrs of age | | |
|  |  | | | Caregiver self-perception + satisfaction level with gov., neighbor, ... | | |
|  |  | | | Caregiver positive self-concept, | | |
|  |  | | | Caregiver negative self-concept | | |
| **LEVEL** | | **CATEGORIES OF FACTORS** | | | **VARIABLES** | |
|  |  | | | Frequency of seeing biological mother | | |
|  |  | | | Frequency of seeing biological father | | |
|  | **HH Socio-Economic status** | | | Compared to other families here how many things does your family have? | | |
|  |  | | | Has the household owned any livestock in the last 12 months? | | |
|  |  | | | Any income collected from plot in last 12 months | | |
|  |  | | | In last 12 months has household given money or goods to support people outside the household | | |
|  |  | | | Would household be able to raise 230,000 VND in one week | | |
|  |  | | | Total Value of Home assets of the HH | | |
|  |  | | | How many Animal owned in total | | |
|  |  | | | sanitation quality | | |
|  |  | | | drinking water quality | | |
|  |  | | | Is household on list of poor households | | |
| **PARENTS** |  | | | Main source of drinking water | | |
|  |  | | | Type of toilet facility | | |
|  |  | | | Has hh had any food shortages in last 12 months | | |
|  |  | | | Compared with 3 yrs ago is your household economy better, same or worse | | |
|  |  | | | Main source of drinking water | | |
|  |  | | | Type of toilet facility | | |
|  |  | | | For your own use how many study material you have, VN Math e-textbook, ruler, bag, calculator | | |
|  |  | | | Has NAME been exempted from tuition by the government? | | |
|  |  | | | Has HH received money from retirement, SS, gov. organization, etc. | | |
|  |  | | | Social support level received in last year | | |
|  | **Parental and Child General Background** | | | Mother tongue grouped | | |
|  |  | | | Father's first language | | |
|  |  | | | Mother's first language | | |
| **PARENTS** |  | | | Caregiver's first language | | |
|  |  | | | Father's ethnic group | | |
|  |  | | | Mother's ethnic group | | |
|  |  | | | Child's ethnic group | | |
|  |  | | | Child's first language | | |
| **LEVEL** | | | **CATEGORIES OF FACTORS** | | | **VARIABLES** |
|  | **Parental Expectations** | | | When NAME is about 20 years old what job do you think he/she will be doing? | | |
| **PARENTS** |  | | | What level of formal education would you like NAME to complete? | | |
|  |  | | | What level of education would you like child to complete | | |
|  |  | | | What job would you most like child to do in the future | | |
|  | **Principal Information & School Management** | | | How often did you face the challenge of teacher attendance in last academic year | | |
|  |  | | | Number of years principal has worked in schools | | |
| **SCHOOL** |  | | | Number of years as principal of primary schools | | |
|  |  | | | Highest level of general education completed by principal | | |
|  |  | | | Highest level of teacher training qualification received by principal | | |
|  |  | | | Number of days school closed for unforeseen circumstances in last academic year | | |
|  | **School Information** | | | In your classroom are there too many pupils for the space available? | | |
|  |  | | | Do you have enough desks & chairs for all pupils in your class? | | |
|  |  | | | Does classroom need major repairs? | | |
|  |  | | | Does each grade 5 class have a separate classroom? | | |
| **SCHOOL** |  | | | level problem of student behavior, poor assistance, late, discipline, lack of material | | |
|  |  | | | Do pupils in your class attend full-day schooling? | | |
|  |  | | | Does school offer full-day schooling to any pupils in Grade 5? | | |
|  |  | | | Does school offer additional classes outside normal day to any students? | | |
|  |  | | | Is this a single-sex school | | |
|  |  | | | Are additional classes taught by same teachers who teach during the normal day? | | |
|  | **Teacher Background, Qualification & Attitudes** | | | Teacher Attitude Positive | | |
|  |  | | | Teacher Attitude Negative | | |
|  |  | | | Employed on temporary or permanent basis | | |
|  |  | | | Highest level of general education completed | | |
|  |  | | | Highest level teacher training qualification received | | |
|  |  | | | Ever been awarded title of excellent teacher? | | |
|  |  | | | Do you do extra work to supplement your income? | | |
| **TEACHER** |  | | | Do you do private tuition to supplement your income? | | |
|  |  | | | Do you always teach Maths to your Grade 5 class? | | |
|  |  | | | By the end of this school yr what is the total number of years you will have bee | | |
| **LEVEL** | | | **CATEGORIES OF FACTORS** | | | **VARIABLES** |
|  |  | | | By the end of the school yr how many years have you been a Grade 5 teacher | | |
|  |  | | | During last academic year how often was your work as a teacher in this school ev | | |
|  |  | | | Number of days of professional/in-service training in the last academic year | | |
|  | **Teaching VN & Math** | | | Number of Maths homework tasks set each week | | |
|  |  | | | How often do pupils in this class use calculators in Maths lessons? | | |
|  |  | | | Do you always teach Vietnamese to your Grade 5 class? | | |
| **TEACHER** |  | | | Difficulty level of Grade 5 Vietnamese textbooks | | |
|  |  | | | Did you specialize in Vietnamese in post-secondary education? | | |
|  |  | | | Difficulty level of Grade 5 Maths textbooks | | |
|  |  | | | Did you specialize in Maths in your post-secondary education? | | |
|  |  | | | Number of minutes class studies Vietnamese each week | | |
|  |  | | | Number of Vietnamese homework tasks set each week | | |
|  |  | | | Number of minutes class studies Maths each week | | |
